1                                    ***BAPC-assisted* CRISPR/Cas9 System:**  
2                                    **Targeted Delivery into Adult Ovaries for Heritable Germline**  
3                                    **Gene Editing (Arthropoda: Hemiptera)**

4  
5                                    **Wayne B. Hunter<sup>1</sup>, Maria T. Gonzalez<sup>1</sup>, John Tomich<sup>2</sup>**

- 6  
7                                    1. USDA, ARS, 2001 South Rock Road, Fort Pierce, FL, 34945. USA.  
8                                    2. John Tomich, Department of Biochemistry and Molecular Biophysics, Kansas  
9                                    State University, Manhattan, KS, 66506. USA.

10  
11                                    Contacts: [Wayne.hunter@ars.usda.gov](mailto:Wayne.hunter@ars.usda.gov) & [Jtomich@ksu.edu](mailto:Jtomich@ksu.edu)

12  
13                                    **ABSTRACT**

14                                    Innovative gene targeting strategies are often limited in application across  
15                                    arthropod species due to problems with successful delivery. In hemipterans,  
16                                    embryonic injections often used to deliver CRISPR components fail due to nearly  
17                                    complete embryo mortality. The Asian citrus psyllid, *Diaphorina citri*,  
18                                    Kuwayama, (Hemiptera: Liviidae), is the vector for a pathogenic bacterium,  
19                                    *Candidatus* Liberibacter asiaticus, CLas, which is devastating the U.S. citrus  
20                                    industries. The disease called, Huanglongbing, HLB, (aka. Citrus greening  
21                                    disease), is transmitted during psyllid feeding. Infection causes severe tree  
22                                    decline, loss of fruits, and eventually tree death. The citrus tree pathogen, CLas,  
23                                    is a fastidious alpha-proteobacterium, which has spread into all citrus growing

24 regions worldwide. The economic losses are estimated in the billions of dollars,  
25 in U.S.A., Brazil, and China. Innovative technologies aimed at reducing psyllid  
26 populations using targeting RNA suppression, like RNAi, or gene-editing tools,  
27 like CRISPR/Cas9 have potential to reduce psyllid vectors and the pathogen in a  
28 highly specific manner. Breakthroughs that improve gene editing in psyllids, such  
29 as the *BAPC-assisted-CRISPR/Cas9* System, enabled delivery by injection of  
30 CRISPR/Cas9 components directly into nymphs and adult females. Injection near  
31 ovaries produced heritable germline gene editing in subsequent generations.  
32 This method opens the world of gene editing across arthropods and bypasses  
33 the need for microinjection of eggs. Effective development of therapeutic  
34 treatments to reduce insect vectors, and stop pathogen transmission would  
35 provide sustainable citrus and grapevine industries.

36

37 **Keywords:** Asian citrus psyllid, Citrus, Gene edit, RNAi Leafhoppers,  
38 Huanglongbing, management, pest control

39

40

## 41 INTRODUCTION

42 Biotechnologies provide techniques that greatly improve the level of safety and  
43 target specificity in the management of pests and pathogens (Bhaya et al, 2011;  
44 Garneau et al, 2010; Fire et al, 1998; Doudna & Charpentier 2014). These  
45 techniques include targeted RNA suppression, gene regulation, and gene editing  
46 in all organisms: bacteria, plants, animals, and humans. As traditional chemical  
47 insecticides fail to provide adequate pest management, due to development of  
48 chemical resistance, dependence upon biotech strategies for management have

49 become the best options for development of therapeutic treatments to reduce  
50 arthropod vectors, the pathogens, or to cause disruption of vector pathogen  
51 acquisition and transmission ([Andrade & Hunter 2016](#); [Baum & Roberts 2014](#);  
52 [Gantz & Akbari 2018](#); [Hunter & Sinisterra-Hunter 2018](#); [Kolliopoulou et al, 2017](#);  
53 [Roberts et al, 2015](#); [Petrick et al, 2013;2016](#); [Scott et al, 2013](#); [Sinisterra-Hunter](#)  
54 [& Hunter 2018](#); [Taning et al, 2017](#); [Zotti et al, 2018](#)). The rapid emergence of  
55 gene editing techniques, like CRISPR/Cas9, Clustered regularly interspaced short  
56 palindromic repeats (CRISPR) and the CRISPR-associated protein, Cas9, provide  
57 precise editing of genes across all species ([Doudna & Charpentier 2014](#); [Peng et](#)  
58 [al., 2014](#); [Wang et al. 2016](#)). As a natural mechanism in bacteria, numerous  
59 studies have described the mode of function of the CRISPR defense system that  
60 is an adaptive mechanism, which enables bacteria to suppress invading viruses  
61 ([Garneau et al, 2010](#); [Doudna & Charpentier 2014](#)). The technology has now been  
62 co-adapted to target genes within insect pests ([Taning et al, 2017](#)). The relative  
63 ease of use, normally by injection into eggs/embryos, combined with improved  
64 methods for increase efficacy in CRISPR/Cas9 systems has led CRISPR/Cas to  
65 become the primary gene editing tool in the life sciences. For reviews on  
66 CRISPR/Cas9 systems see: ([Boettcher & McManus 2015](#); [Dominguez et al. 2016](#);  
67 [Gupta & Shukla 2016](#); [La Russa & Qi 2015](#); [Liang et al. 2015](#); [Taning et al, 2017](#);  
68 [Wang et al. 2016](#); [Wilson & Doudna 2013](#)). Reviews on other gene editing  
69 systems with Zinc finger nucleases and TAL effector nucleases, TALENS, see: ([Gaj](#)  
70 [et al, 2013](#); [Bortesi & Fischer 2015](#); [Markert et al, 2016](#)).

71 CRISPR/Cas systems have demonstrated important applications in  
72 agriculture, increasing the options for the management of arthropod pests, insect  
73 vectors, and treatments against pathogens of plants, animals and humans (Chen  
74 et al, 2016; Chen et al, 2017; Cui et al, 2017; Taning et al, 2017; Sun et al, 2017;  
75 Gantz & Akbari 2018; Gundersen-Rindal et al, 2017; Sinisterra-Hunter & Hunter  
76 2018). However, one of the hurdles for rapid adoption in arthropods has been  
77 the reliance on embryo injections (Li et al, 2017), which is often unsuccessful in  
78 many arthropod species (Bortesi & Fischer 2015; Boettcher & McManus, 2015;  
79 Chaverra-Rodriguez et al, 2018; Gregory et al, 2016). Thus, an improved delivery  
80 method is needed if gene editing is to be realized for many arthropod species.  
81 This is especially true within the Hemiptera, which have few successful  
82 demonstrations of embryonic transformation through microinjection of eggs.

83 In 2018, Hunter described a direct method that delivered and produced  
84 gene editing using injections into the abdomens of nymphs, pupae, and adults  
85 of hemipterans. Specific examples were the Asian citrus psyllid (*Diaphorina citri*,  
86 Kuwayama, Hemiptera: Liviidae) and glassy-winged sharpshooter leafhopper  
87 (*Homalodisca vitripennis*, (Germar): Hemiptera: Cicadellidae) (Hunter et al,  
88 2018ab). Previous attempts injecting thousands of eggs failed. Switching to  
89 injection of 5<sup>th</sup> instar nymphs and adult females, produced the first successful  
90 trials of gene knockouts in psyllids used the Cas9 protein, co-injected with two  
91 sgRNA, producing about 30% surviving G0 and G1 mutants. To improve the  
92 system, experiments evaluated the incorporation of BAPC-assisted delivery  
93 (Hunter, Gonzalez, Tomich 2018).

94

95

## 96 ***BAPC-assisted* Delivered RNA interference In Arthropods**

97       The **Branched Amphiphilic Peptide Capsules (BAPC),** are a new class of  
98 inert, self-assembling peptide nano-capsular spheres (Phoreus Biotechnology,  
99 Inc., Olathe, KS, USA). The peptide-based nano-assemblies show promise as nano-  
100 delivery vehicles for the safe, targeted transport of drugs, plasmids, dsRNA, and  
101 siRNA, to specific tissues and organs with minimal off target accumulation  
102 ([Gudlur et al, 2012](#); [Sukthankar et al, 2013](#); [2014](#); [Avila et al, 2015](#)).

103 Studies on RNAi report that incorporation of BAPC with dsRNA to specific beetle  
104 genes, caused significant increase in mortality compared to controls upon  
105 ingestion ([Avila et al, 2018](#)). In those studies, BAPC-dsRNA was fed to *Tribolium*  
106 *castaneum* (Coleoptera), and the pea aphid, *Acyrtosiphon pisum* (Hemiptera).  
107 The authors report an improved delivery of dsRNA into cells most likely due to  
108 presence of the BAPC, which prevents degradation by nucleases, producing  
109 slower controlled release of the dsRNA upon entering cells, resulting in increased  
110 RNAi efficacy and subsequent increased mortality of the insects.

111       Based on the physical properties of BAPC with nucleic acids we  
112 hypothesized that BAPC mixed with guide RNA's and CRISPR/Cas9 components  
113 would result in improved delivery and produce a new method for heritable  
114 germline gene editing suitable for injection into adult ovaries of psyllids and

115 other arthropods (Hunter & Sinisterra-Hunter 2018; Hunter, Gonzalez, Tomich  
116 2018; Hunter et al, 2019).

117 Similar proofs-of-concepts in flies are reported by Chaverra-Rodriguez et  
118 al, (2018) in mosquitoes using the P2C peptide mediated transduction of the  
119 Cas9 plasmid from the female hemolymph into the developing mosquito oocytes.  
120 Their technology, termed “Receptor-Mediated Ovary Transduction of Cargo  
121 (ReMOT Control), was shown to work well within the Order: Diptera (Mosquitoes).  
122 Another delivery system reported by Wang et al, (2018), in mammals, used  
123 microvesicles. Extracellular vesicles, known as *arrestin domain containing*  
124 *protein 1* [ARRDC1]-mediated microvesicles (ARMMs). These ARMMs, could  
125 package and deliver intracellularly of a myriad of macromolecules, including the  
126 tumor suppressor p53 protein, RNAs, and the genome-editing CRISPR-  
127 Cas9/guide RNA complex into mammalian cells.

128 ***BAPC-assisted-CRISPR/Cas9 Delivery System: Adult injection near ovaries for***  
129 ***heritable germline gene editing [Hemiptera: *Diaphorina citri*].***

130 Attempts to deliver CRISPR/Cas9 into psyllid eggs proved to be difficult  
131 and unsuccessful. Injection directly into the 4<sup>th</sup> and 5<sup>th</sup> nymphs, pupae, or adults  
132 proved to be easier, and more effective (Hunter, Gonzalez, Tomich 2018).  
133 Because previous research with BAPC-assisted delivery of dsRNA and plasmids  
134 resulted in efficient delivery into insects and animal cells in cultures (Avila et al,  
135 2018; Sukthankar et al, 2014), an experiment was designed to evaluate the  
136 incorporation of BAPC to improve delivery of CRISPR/Cas9 components into

137 arthropod ovaries of adult hemipterans (Psyllids and Leafhoppers) for heritable  
138 embryonic gene editing.

139 **Gene Selection.** *Diaphorina citri*, have at least two Thioredoxins, TRX-1, TRX-2,  
140 with variants in the mitochondria and cytoplasm. Thioredoxin participates in  
141 various redox reactions and catalyzes dithiol-disulfide exchange reactions.  
142 Thioredoxin 2, TRX-2, is preferred over thioredoxin 1, as a reducing substrate of  
143 peroxiredoxin-1. Thioredoxin is required for female meiosis and early embryonic  
144 development. The functions of at least 30 proteins, including enzymes and  
145 transcription factors, the regulation of cellular proliferation and the aging  
146 process are regulated by TRX (Yoshida et al, 2005). The guide RNA's and  
147 protospacer adjacent motif (PAM) were identified and confirmed using software  
148 (Dharmacon, Inc., (Lafayette, CO, 80026). The CRISPR-associated protein 9 (Cas9)  
149 was purchased, and protocols were gleaned from publications on CRISPR (Bassett  
150 et al, 2013; Kistler, et al, 2015; Larson, et al, 2013; Zhang & Reed 2017;  
151 Garczynski et al, 2017). The ACP gene sequence ID: XM\_008487100.1, gene,  
152 thioredoxin-2-like (LOC103521994) was from the DIACI\_2.0 Genome assembly:  
153 [https://citrusgreening.org/organism/Diaphorina\\_citri/genome](https://citrusgreening.org/organism/Diaphorina_citri/genome) (Saha et al,  
154 2017).

### 155 **CRISPR/Cas9 Injections**

156 Injections with CRISPR components, sgRNA's, and a Cas9 protein,  
157 successfully produced knock-out G0 and G1 mutants (Hunter, Gonzalez, Tomich  
158 2018). Subsequent trials incorporated the aid of the *BAPC-assisted*-CRISPR

159 components, successfully produced heritable knockout G2 mutants. Both these  
160 methods successfully demonstrated the first psyllid gene knockouts, KO, with  
161 CRISPR/Cas9. Designs to *Diaphorina citri*, Asian citrus psyllid, ACP, (Hemiptera:  
162 Liviidae) for the knockout used two gRNAs to direct the Cas9 endonuclease to  
163 two sites 556 bp apart (Dharmacon, Inc.). The ACP-TRX-2 KO trials injected 30  
164 nymphs (4<sup>th</sup> and 5<sup>th</sup> instar), and 20 adult females per treatment (co-injection of  
165 two sgRNAs (100 ng/  $\mu$ L of each, with 200 ng/ $\mu$ L of Cas9 protein, plus BAPC (0.1  
166 ng/  $\mu$ L) (Drummond Nanoject III, 3-000-207) (Hunter, Gonzalez, Tomich 2018;  
167 Hunter et al, 2018; Hunter & Sinisterra 2018). Insects were injected ventrally, off  
168 center of midline in the abdomen (FIG. 1). Post injections psyllids were  
169 transferred to a citrus seedling to oviposit (~25 cm tall, sweet orange seedlings).  
170 A cohort of 6 psyllid adult females were individually analyzed 7 d post treatments  
171 using PCR analyses and sequencing. Primers were designed to bracket the gDNA  
172 KO sequence of the TRX ORF at 200 to 250 nt beyond the ends in each direction.  
173 The remaining cohort of ACP nymphs, which were TRX-KO mutants took 6 to 8 d  
174 longer to eclose to adults. The adult psyllids with TRX-KO had significantly  
175 shorter lifespans post eclosion living an average 8.5 d, compared to controls  
176 injected with buffer, or GFP-plasmid (FIG. 2), which lived an average of 16 d post  
177 eclosion (Hunter Gonzalez, Tomich 2018; Hunter & Sinisterra-Hunter 2018;  
178 Hunter et al, 2019). (Plasmid resource, Addgene™: pAc5.1B-EGFP was a gift from  
179 Elisa Izaurralde, Addgene plasmid #21181)(Karlikow et al, 2016; Legaz et al,  
180 2015). Adult female insects producing eggs (FIG. 3), when treated also produced



181 G2 mutants. Delivery of a GFP-plasmid, when mixed with BAPC, was successfully  
182 ingested and expressed in adult psyllids (FIG. 4).

### 183 **Conclusions:**

184 Advances in biotechnologies, like CRISPR and RNAi provides new sustainable  
185 and environmentally friendly strategies to reduce insect vectors, like psyllids  
186 (Andrade & Hunter 2016; 2017; Hunter & Sinisterra-Hunter 2018; Taning et al,  
187 2016; Ghosh et al, 2018). These advances will also aid in the management of  
188 many other insect vectors and pests (Chaverra-Rodriguez et al, 2018;  
189 Darrington et al, 2017; Dong, et al, 2015; 2018; Gantz & Akbari 2018; Ghosh et  
190 al, 2018; Kolliopoulou et al, 2017; Sinisterra-Hunter & Hunter 2018; Taning et  
191 al, 2017; Zotti et al, 2018).

192 CRISPR/Cas9 gene editing in hemipterans was shown to be feasible using  
193 nymphs and adult psyllids, as the recipient for gene editing CRISPR components.  
194 The method was a significant improvement over efforts using injection of eggs.  
195 Furthermore, incorporation of *BAPC-assisted* delivery of CRISPR/Cas9  
196 components into nymph and adults provides an innovative breakthrough in  
197 hemipteran gene editing. Production of G2 mutants, from *BAPC-assisted*-  
198 CRISPR/Cas9 injected, adult female psyllids further supports the viability of this  
199 method. Improvements in efficacy, by adjusting component concentration ratios  
200 still need to be evaluated across several hemipteran species.

201

202 **Acknowledgements:**

203 We thank Dr. Steve Garczynski for consultations on CRISPR/Cas9; Ken Sims,  
204 Biological Science Technician, sample fixation, paraffin embedding, and Jennifer  
205 Wildonger, Technician, sample sectioning, confocal, USDA, ARS, Ft. Pierce, FL.,  
206 Dr. Michael Boyle, confocal training, Smithsonian Marine Station, Ft. Pierce, FL,  
207 and Chris S. Holland, confocal imaging, bioassay trials, ORISE program  
208 DOE/USDA. *This research was supported in part by an appointment to the*  
209 *Agricultural Research Service (ARS) Research Participation Program*  
210 *administered by the Oak Ridge Institute for Science and Education (ORISE)*  
211 *through an interagency agreement between the U.S. Department of Energy (DOE)*  
212 *and the U.S. Department of Agriculture (USDA). ORISE is managed by ORAU under*  
213 *DOE contract number DE-SC0014664. All opinions expressed in this paper are*  
214 *the author's and do not necessarily reflect the policies and views of USDA, ARS,*  
215 *DOE, or ORAU/ORISE.* USDA, ARS 2015-2018. Funding in part from: National  
216 Institute of Food and Agriculture, USDA, Specialty Crops Research  
217 Initiative/Citrus Disease Research & Extension. Award #2015-70016-23028,  
218 Developing an Infrastructure and Product Test Pipeline to Deliver Novel Therapies  
219 for Citrus Greening Disease, Lead Dr. Susan Brown. Kansas State Univ.,  
220 Manhattan, KS, & USDA, ARS, Fort Pierce, FL.

221 **Disclaimer:**

222 *This article is a US Government work and is in the public domain in the USA.*  
223 *Mention of a trademark or proprietary product is for identification only and does*  
224 *not imply a guarantee or warranty of the product by the US Department of*

225 *Agriculture. The US Department of Agriculture prohibits discrimination in all its*  
226 *programs and activities on the basis of race, color, national origin, gender,*  
227 *religion, age, disability, political beliefs, sexual orientation and marital or family*  
228 *status.*

229

230 **Figure\_1. Method of micro-injection of CRISPR/Cas9 components into**  
231 **abdomens of 4<sup>th</sup>, 5<sup>th</sup> instars and adult female, Asian citrus psyllid, *Diaphorina***  
232 ***citri*, (Hemiptera: Liviidae)(Drummond Nanoject III). Nymph on citrus leaf (Left).**  
233 Nymphs and adults were placed onto solidified, chilled, 1% agar for injections.  
234 Shown is artificial dyed solution for easier visualization of method. Abdomen is  
235 most proximal, with the head and two dark antennae more distal.

236

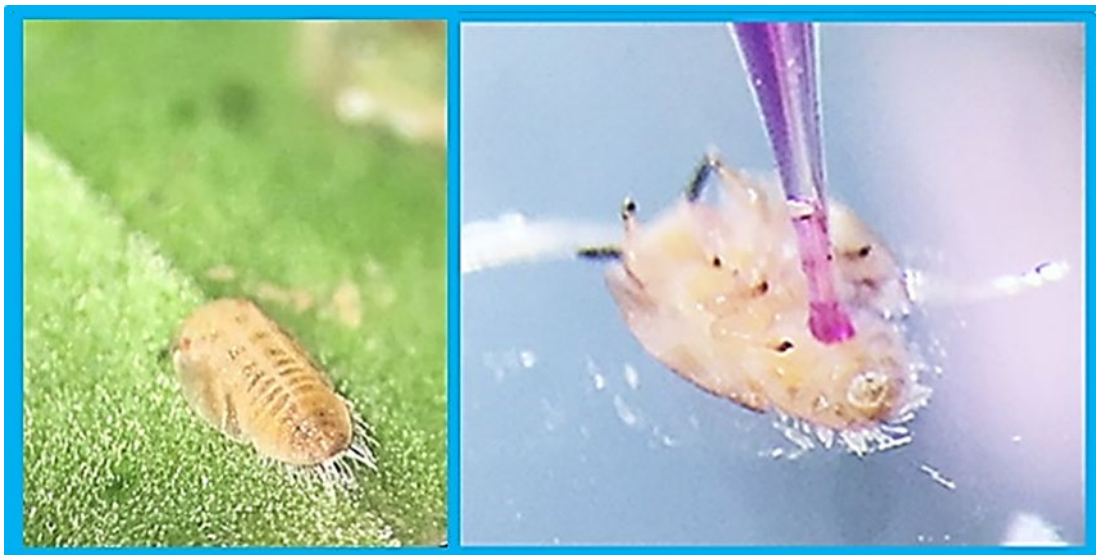

237

238

239

240 **Figure\_2. Female adult Asian Citrus Psyllid, *Diaphorina citri* Kuwayama. A)**  
241 Female anatomy showing ovaries, and spermatheca in diagram. Fresh dissection  
242 (stained dark blue, Tryptophan). Injection of plasmid-GFP expression, psyllid  
243 dissected 8 d post injection. Illumination of Green fluorescent protein, GFP with  
244 UV light (Blue Arrows). **B)** The GFP-plasmid (MTG-Dc-1, actin) was injected, **C)**  
245 Expression under Dc-Actin promoter identified from *DIACI\_2.0 genome*,  
246 OGS\_0.2v (Saha, et al, 2017). (Plasmid, Addgene, Karlikow et al, 2016).

247

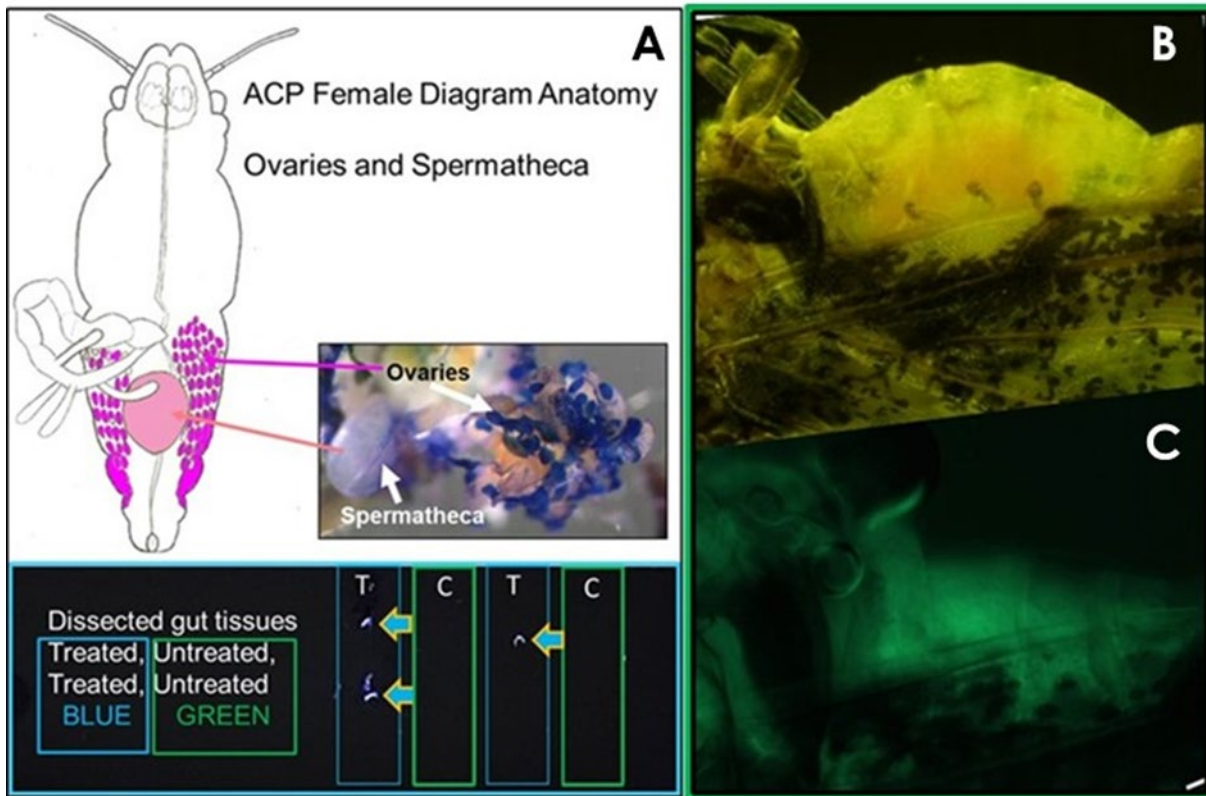

248

249

250

251

252

253 **Figure\_3. Micro-CT imaging of adult female Asian citrus psyllid, *Diaphorina***

254 *citri*, Kuwayama (Hemiptera: Liviidae). (Alba-Tercedor, J. and Hunter, W.B. 2016).

255 [www.citrusgreening.org](http://www.citrusgreening.org) [Alba-Tercedor et al, 2018].

256

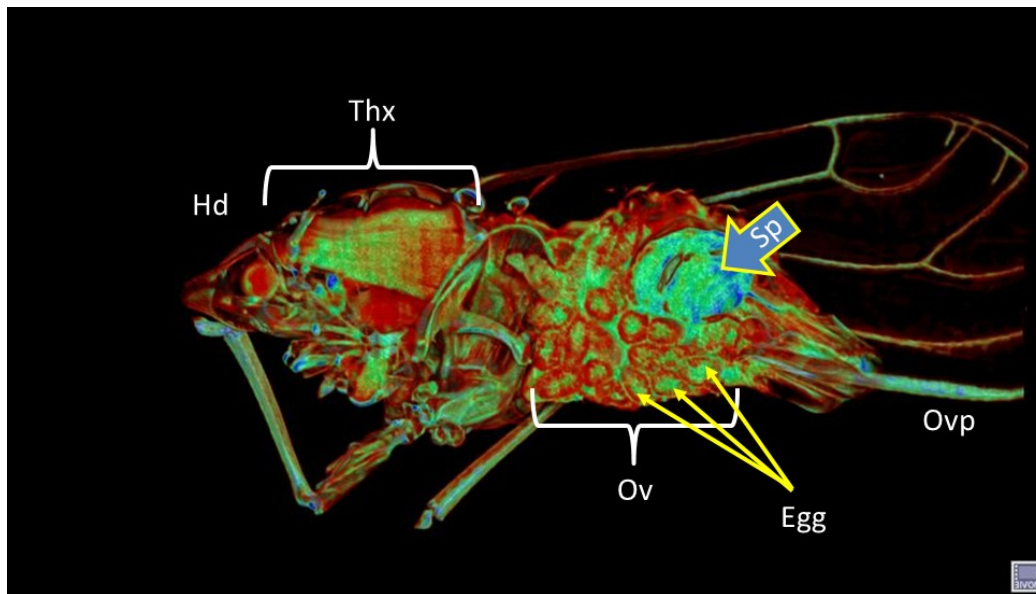

257

258

259

260

261 **Figure\_4. BAPC-assisted delivery of GFP-plasmid post ingestion.** Trial using  
262 BAPC-labeled with fluorescent Probe Atto488. Oral delivery to adult psyllid, 5 d  
263 post feeding, from sucrose solution (25%) plus BAPC in feeding satchet. Thick-  
264 section of single psyllid abdomen tissues fixed and parafilm embedded, thick  
265 section, (GFP insert, green). Demonstrated delivery and location post ingestion  
266 of BAPC in psyllid tissues. Psyllid actin promoter designed as previously  
267 mentioned in methods (MTG-Dc-1).

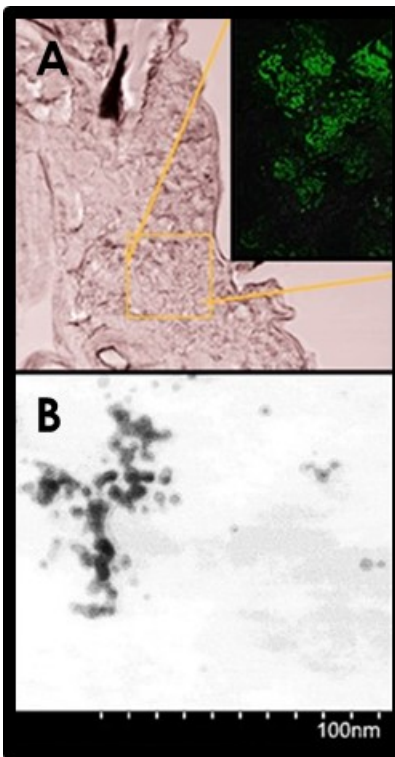

268  
269  
270

271 **References**

- 272 Alba-Tercedor, J., Hunter, W.B. 2016. Micro-CT imaging of adult female Asian  
273 citrus psyllid, *Diaphorina citri*, Kuwayama (Hemiptera: Liviidae).  
274 [www.citrusgreening.org](http://www.citrusgreening.org)
- 275 Alba-Alejandre, I., Hunter, W.B., Alba-Tercedor, J. 2018. Micro-CT study of male  
276 genitalia and reproductive system of the Asian citrus psyllid, *Diaphorina citri*  
277 Kuwayama, 1908 (Insecta: Hemiptera, Liviidae). PLoS ONE 13(8): e0202234.  
278 <https://doi.org/10.1371/journal.pone.0202234> .
- 279 Alba-Tercedor, J., Hunter, W.B., Cicero, J.M., Sáinz-Bariáin, M., Brown, S.J. 2017.  
280 Use of micro-CT to elucidate details of the anatomy and feeding of the Asian  
281 citrus psyllid, *Diaphorina citri* Kuwayama, 1908 (Insecta: Hemiptera, Liviidae).  
282 Micro-CT User Meeting 2017. Pp. 270-285. Royal Belgian Institute of Natural  
283 Science, Brussels.
- 284 Andrade, C.E., Hunter, W.B. 2016. RNA interference –Natural gene-based  
285 technology for highly specific pest control (HiSPeC) *In* RNA Interference, ed I. Y.  
286 Abdurakhmonov (Croatia: InTech), 391–409.  
287 [http://www.intechopen.com/books/rna-interference/rna-interference-natural-gene-](http://www.intechopen.com/books/rna-interference/rna-interference-natural-gene-based-technology-for-highly-specific-pest-control-hispec-)  
288 [based-technology-for-highly-specific-pest-control-hispec-](http://www.intechopen.com/books/rna-interference/rna-interference-natural-gene-based-technology-for-highly-specific-pest-control-hispec-)
- 289 Andrade, EA., Hunter, W.B. 2017. RNAi feeding bioassay: development of a non-  
290 transgenic approach to control Asian citrus psyllid and other hemipterans.  
291 Entomol. Exper. et Applic. 162:389-396. Doi:10.1111/eea.12544
- 292 Avila, L.A., Aps, L. R. M. M., Sukthankar, P., Ploscariu, N., Gudlur, G., Šimo, L.  
293 Szoszkiewicz, R., Park, Y., Lee, S. W., Iwamoto, T., Ferreira, L., Tomich, J. M.  
294 2015. Alternate supramolecular structures for different ratios of branched  
295 amphiphilic cationic peptide /DNA assemblies: Correlation with gene delivery  
296 Mol. Pharm. 12(3):706-715.
- 297 Avila, L.A., Chandrasekar, R., Wilkinson, K., Balthazor, J., Herman, M., Bechard,  
298 J., Brown, S., Schoenek, B., Dhar, S., Tomich, J.M. Reeck, G.R. 2018. Delivery of  
299 lethal dsRNAs in insect diets by branched amphiphilic peptide capsules. J.  
300 Contrl Release. 273:139-146.
- 301 Bassett, A.R., Tibbit, C., Ponting, C.P., Liu, J. 2013. Mutagenesis and  
302 homologous recombination in *Drosophila* cell lines using CRISPR/Cas9. Biol.  
303 Open 3:42-49.
- 304 Bhaya, D., Davison, M., Barrangou, R. 2011. CRISPR-Cas systems in bacteria and  
305 archaea: versatile small RNAs for adaptive defense and regulation. Annu. Rev.  
306 Genet. 45: 273–297. Doi:10.1146/annurev-genet-110410-132430.



- 307 Boettcher, M.; McManus, M.T. 2015. Choosing the right tool for the job: RNAi,  
308 TALEN, or CRISPR. *Mol. Cell* 58:575–585.  
309 Doi.org/10.1016/j.molcel.2015.04.028.
- 310 Bortesi, L., Fischer, R. 2015. The CRISPR/Cas9 system for plant genome editing  
311 and beyond. *Biotechnol Adv.* 33(1):41-52.  
312 Doi:10.1016/j.biotechadv.2014.12.006.
- 313 Chaverra-Rodriguez, D., Macias, V.M., Hughes, G.L., Pujhari, S., Suzuki, Y.,  
314 Peterson, D.R., Kim, D., McKeand, S., Rasgon, J.L. 2018. Targeted delivery of  
315 CRISPR-Cas9 ribonucleoprotein into arthropod ovaries for heritable germline  
316 gene editing. *Nature Communications* 9:3008. Doi:10.1038/s41467-018-  
317 05425-9.
- 318 Chen, L., Wang, G., Zhu, Y. N., Xiang, H., Wang, W. 2016. Advances and  
319 perspectives in the application of CRISPR/Cas9 in insects. *Zool. Res.* 37, 220-  
320 228. Doi.10.13918/j.issn.2095-8137.2016.4.220
- 321 Chen, S., Hou, C., Bi, H., Wang, Y., Xu, J., Li, M., et al. 2017. Transgenic CRISPR/  
322 Cas9-mediated viral gene targeting for antiviral therapy of *Bombyx mori*  
323 nucleopolyhedrovirus (BmNPV). *J. Virol.* 91,e02465–e02516.  
324 Doi:10.1128/JVI.02465-16.
- 325 Cui, Y.B., Sun, J.L., Yu, L.L. 2017. Application of the CRISPR gene-editing  
326 technique in insect functional genome studies- a review. *Entomol. Exp. Appl.*  
327 162:124–132. Doi:10.1111/eea.12530.
- 328 Darrington, M., Dalmay, T., Morrison, N.I., Chapman, T. 2017. Implementing  
329 the sterile insect technique with RNA interference – a review. *Entomologia*  
330 *Experimentalis et Applicata* 164:155–175. Doi.10.1111/eea.12575.
- 331 Dominguez, A.A., Lim, W.A., Qi, L.S. 2016. Beyond editing: repurposing CRISPR-  
332 Cas9 for precision genome regulation and interrogation. *Nat. Rev. Mol. Cell*  
333 *Biol.* 17:5–15. Doi.10.1038/nrm.2015.2.
- 334 Dong, S., Lin, J., Held, N.L., Clem, R.J., Passarelli, A.L., Franz, A.W.E. 2015.  
335 Heritable CRISPR/Cas9-mediated genome editing in the yellow fever mosquito,  
336 *Aedes aegypti*. *PLoS ONE* 10:1–13. Doi.org/10.1371/journal.pone.0122353
- 337 Doudna, J.A., Charpentier, E. 2014. The new frontier of genome engineering  
338 with CRISPR-Cas9. *Science* 346(6213):1258096. Doi:10.1126/science.1258096.
- 339 Fire, A., Xu, S., Montgomery, M.K., Kostas, S.A., Driver, S.E., Mello, C.C., 1998.  
340 Potent and specific genetic interference by double-stranded RNA in  
341 *Caenorhabditis elegans*. *Nature.* 391:806-811. Doi:10.1038/35888.

- 342 Gaj, T., Gersbach, C.A., Barbas, C.F, III. 2013. ZFN, TALEN, and CRISPR/Cas-  
343 based methods for genome engineering. Trends in Biotechnology 31:397-405.  
344 doi.org/10.1016/j.tibtech.2013.04.004.
- 345 Gantz, V.M., Akbari, O.S. 2018. Gene editing technologies and applications for  
346 insects. Current Opinion in Insect Science 28:66–72.  
347 Doi.org/10.1016/j.cois.2018.05.006.
- 348 Garczynski, S.F., Martin, J.A., Griset, M., Willett, L.S., Cooper, W.R., Swisher,  
349 K.D., Unruh, T.R. 2017. CRISPR/Cas9 Editing of the codling moth (Lepidoptera:  
350 Tortricidae) *CpomOR1* gene affects egg production and viability. Journal of  
351 Economic Entomology, 110(4), 2017, 1847–1855. Doi:10.1093/jee/tox166.
- 352 Garneau, J.E., Dupuis, M., Viooion, M., Romero, D., Barrangou, R., Boyaval, P.,  
353 Fremaux, C., Horvath, P., Magadan, A., Moineau, S. 2010. The CRISPR/Cas  
354 bacterial immune system cleaves bacteriophage and plasmid DNA. Nature  
355 468:67–71.
- 356 Ghosh, S.K., Hunter, W.B., Park, A.L., Gundersen-Rindal, D.E. 2017. Double  
357 strand RNA delivery system for plant-sap-feeding insects. PLOS ONE 12(2):  
358 e0171861. Doi:10.1371/journal.pone.0171861.
- 359 Ghosh, S.K., Gundersen-Rindal, D.E., Park, A.L., Hunter, W.B. 2018. Double-  
360 stranded RNA oral delivery methods to induce RNA interference in phloem and  
361 plant-sap-feeding hemipteran insects. J. Visualized Experiments 135, e57390.  
362 Doi:10.3791/57390.
- 363 Gregory, M., Alphey, L., Morrison, N.I., Shimeld, S.M. 2016. Insect  
364 transformation with piggyBac: getting the number of injections just right. Insect  
365 Mol Biol. 25:259-271. Doi:10.1111/imb.12220.
- 366 Gudlur, S., Sukthankar, P., Gao, J. Avila, L.A., Hiromasa, Y., Chen, J., Iwamoto,  
367 T., Tomich, J.M. (2012) Peptide Nanovesicles Formed by the Self-Assembly of  
368 Branched Amphiphilic Peptides. PLOS ONE. 7(9) e45374.  
369 Doi:10.1371/journal.pone.0045374.
- 370 Gundersen-Rindal, D., Adrianos, S., Allen, M., Becnel, J.J., Chen, Y.P., *et al.* (28).  
371 2017. Arthropod genomics research in the United States Dept. Agriculture-  
372 Agricultural Res. Service: Applications of RNA interference and CRISPR gene-  
373 editing technologies in pest control. Trends in Entomology 13:109-137.
- 374 Gupta, S.K., Shukla, P. 2016. Gene editing for cell engineering: trends and  
375 applications, Critical Reviews in Biotechnology,  
376 Doi.10.1080/07388551.2016.1214557
- 377 Hunter, W.B., Clarke, S.V., Sandoval Mojica, A.F., Paris, T., Metz, J.L., Holland,  
378 C.S., *et al.* (9). 2019. Advances in RNA suppression of the Asian Citrus Psyllid

- 379 Vector of bacteria causing Huanglongbing (Hemipteran vector / Liberibacter  
380 pathogens). Chpt. 19. HLB. Book, (eds) Phil Stansly and Jawwad Qureshi.  
381 Commonwealth Agricultural Bureau International (CABI Press). (*in press*).
- 382 Hunter, W.B., Metz, J.L., Temeyer, K.B., de Leon, A.P., Pelz-Stelinski, K. Sandoval  
383 Mojica, A.F., McCollum, G., Aishwarya, V. 2018a. FANA\_ASO Reduces Pathogens  
384 and Pest of Fruit Crops: Citrus and Grapevine. International Plant & Animal  
385 Genome XXVI Conf., San Diego, CA. Jan. 13-18. USA.
- 386 Hunter, WB., Mojica, AS., Paris, T., Miles, G., Metz, J., McCollum, G., Boyle, M.,  
387 Altman, S., Aishwarya, V, Qureshi, J. 2018b. Antisense Oligonucleotides, F-  
388 ASO, and PPMO, new tools to reduce pests and pathogens in citrus and other  
389 agricultural crops. 92<sup>nd</sup> Ann. Meeting Southeastern Branch, Entomol. Soc.  
390 America, March 5-7. Orlando, FL. USA.
- 391 Hunter, W.B., Gonzalez, M.T., Tomich, J.M. 2018. BAPC-CRISPR/Cas9 System for  
392 Heritable Embryonic Gene Editing: Gene Knock-Out, Asian Citrus Psyllid. Proc.  
393 The 101st Ann. Meeting Int'l Florida Entomological Society, St. Augustine, FL,  
394 USA. July 22-25. [http://www.flaentsoc.org/dl/18\\_HUNTER\\_BAPC-CRISPR-  
395 Cas9\\_FES%2022July%20.pdf](http://www.flaentsoc.org/dl/18_HUNTER_BAPC-CRISPR-Cas9_FES%2022July%20.pdf)
- 396 Hunter, W.B., Sinisterra-Hunter, X. 2018. Emerging RNA Suppression  
397 Technologies to Protect Citrus Trees from Citrus Greening Disease Bacteria.  
398 *Advances Insect Physiology* 55:163-199. Doi.org/10.1016/bs.aip.2018.08.001
- 399 Karlikow, M., Goic, B., Mongelli, V., Salles, A., Schmitt, C., Bonne, I., Zurzolo, C.,  
400 Saleh, M.C. Drosophila cells use nanotube-like structures to transfer dsRNA and  
401 RNAi machinery between cells. 2016. *Sci. Rep.* 6:27085.  
402 Doi:10.1038/srep27085.
- 403 Kistler, K.E., Vosshall, L.B. Matthews, B.J. 2015. Genome engineering with  
404 CRISPR-Cas9 in the mosquito *Aedes aegypti*. *Cell Rep.* 11:51-60.  
405 <https://doi.org/10.1016/j.celrep.2015.03.009>.
- 406 Kolliopoulou, A., Taning, C.N.T., Smaghe, G., Swevers, L. 2017. Viral delivery  
407 of dsRNA for control of insect agricultural pests and vectors of human disease:  
408 Prospects and challenges. *Front. Physiol.* 8:399.  
409 Doi:10.3389/fphys.2017.00399.
- 410 La Russa, M.F., Qi, L.S. 2015. The new state of the art: Cas9 for gene activation  
411 and repression. *Mol. Cell. Biol.* 35:3800-3809. Doi.10.1128/MCB.00512-15.
- 412 Larson, M.H., Gilbert, L.A., Wang, X., Lim, W.A., Weissman, J.S., Qi, L.S. 2013.  
413 CRISPR interference (CRISPRi) for sequence-specific control of gene expression.  
414 *Nature Protocols* 8(11):2180-2196. Doi:10.1038/nprot.2013.132.

- 415 Legaz, S., Exposito, J.Y., Borel, A., Candusso, M.P., Megy, S., Montserret, R.,  
416 Lahaye, V., Terzian, C., Verrier, B. A purified truncated form of yeast Gal4  
417 expressed in *Escherichia coli* and used to functionalize poly(lactic acid)  
418 nanoparticle surface is transcriptionally active in cellulose. 2015. *Protein Expr*  
419 *Purif.* 113:94-101. Doi:10.1016/j.pep.2015.05.009.
- 420 Li, M., Au, L.Y.C., Douglah, D., Chong, A., White, B.J., Ferree, P.M., Akbari, O.S.  
421 2017. Generation of heritable germline mutations in the jewel wasp *Nasonia*  
422 *vitripennis* using CRISPR/Cas9. *Scientific Reports* 7:901. Doi:10.1038/s41598-  
423 017-00990-3.
- 424 Liang, X., Potter, J., Kumar, S., Zou, Y., Quintanilla, R., *et al.* 2015. Rapid and  
425 highly efficient mammalian cell engineering via Cas9 protein transfection. *J.*  
426 *Biotechnol.* 208:44–53. Doi:10.1016/j.jbiotec.2015.04.024.
- 427 Markert, M.J., Zhang, Y., Enuameh, M.S., Reppert, S.M., Wolfe, S.A., Merlin, C.  
428 2016. Genomic access to monarch migration using TALEN and CRISPR/Cas9-  
429 mediated targeted mutagenesis. *G3: Genes, Genomes, Genetics* 6:905-915.
- 430 Peng, Y., Clark, K.J., Campbell, J.M., Panetta, M.R., Guo, Y., Ekker, S.C. 2014.  
431 Making designer mutants in model organisms. *Development* 141:4042–4054.
- 432 Petrick, J.S., Brower-Toland, B., Jackson, A.L., Kier, L.D. 2013. Safety assessment  
433 of food and feed from biotechnology-derived crops employing RNA-mediated  
434 gene regulation to achieve desired traits: a scientific review. *Regulatory Toxicol.*  
435 *Pharmacol.* 66:167–176. Doi:10.1016/j.yrtph.2013.03.008.
- 436 Petrick, J.S., Friedrich, G.E., Carleton, S.M., Kessenich, C.R., Silvanovich, A.,  
437 Zhang, Y., Koch, M.S., 2016. Corn rootworm-active RNA DvSnf7: repeat dose  
438 oral toxicology assessment in support of human and mammalian safety. *Reg.*  
439 *Tox. Pharm.* 81:57e68. <http://dx.doi.org/10.1016/j.yrtph.2016.07.009>.
- 440 Roberts, A.F., Devos, Y., Lemgo, G.N.Y., Zhou, X. 2015. Biosafety research for  
441 non-target organism risk assessment of RNAi-based GE plants. *Front. Plant Sci.*  
442 6:958. Doi:10.3389/fpls.2015.00958.
- 443 Saha, S., Hosmani, P.S., Villalobos-Ayala, K., Miller, S., *et al.* (44). 2017.  
444 Improved annotation of the insect vector of Citrus greening disease: Biocuration  
445 by a diverse genomics community. *Database* 2017:bax032.  
446 <https://doi.org/10.1093/database/bax032>
- 447 Scott, J.G., Michel, K., Bartholomay, L., Siegfried, B.D., Hunter, W.B., Smagghe,  
448 G., Zhu, K.Y., Douglas, A.E. 2013. Towards the elements of successful insect  
449 RNAi. *Journal of Insect Physiology* 59:1212-1221.  
450 <http://dx.doi.org/10.1016/j.jinsphys.2013.08.014>

- 451 Sinisterra-Hunter, X., Hunter, W.B. 2018. Towards a holistic integrated pest  
452 management: Lessons learned from plant-insect mechanisms in the field. Chpt.  
453 10. Pp.204-226. *In* The Biology of Plant-Insect Interactions: A Compendium for  
454 the Plant Biotechnologist. 236 Pgs. Chandrakanth Emani (ed). ISBN  
455 9781498709736-CAT#K25008. CRC Press.
- 456 Sukthankar, P., Avila, L.A., Whitaker, S.K., Iwamoto, T., Morgenstern, A.,  
457 Apostolidis, C., Liu, K., Hanzlik, R.P. Dadachova, E., Tomich, J.M. 2014.  
458 Branched Amphiphilic Peptide Capsules: Cellular uptake and retention of  
459 encapsulated solutes. *Biochim, Biophys. Acta, Biomembranes* 1838:2296–2305.
- 460 Sukthankar, P., Gudlur, S., Avila, L.A., Whitaker, S., Katz, B.B., Hiromasa, Y.,  
461 Gao, J., Thapa, P., Moore, D., Iwamoto, T., Tomich, J.M. 2013. Branched  
462 oligopeptides form nano-capsules with lipid vesicle characteristics. *Langmuir*  
463 29:14648–14654.
- 464 Taning, C.N.T., Christiaens, O., Berkvens, N., Casteels, H., Maes, M., Smagghe,  
465 G. 2016. Oral RNAi to control *Drosophila suzukii*: laboratory testing against  
466 larval and adult stages. *J. Pest Sci.* 89, 803–814. Doi:10.1007/s10340-016-  
467 0736-9
- 468 Taning, C.N.T., van Eynde, B., Yu, N., Ma, S., Smagghe, G. 2017. CRISPR/Cas9 in  
469 insects: applications, best practices and biosafety concerns. *J. Insect Physiol.*  
470 98:245-257. Doi.org/10.1016/j.jinsphys.2017.01.007.
- 471 Wang, H., Russa, M.L., Qi, L.S. 2016. CRISPR/Cas9 in genome editing and  
472 beyond. *Annu. Rev. Biochem.* 85:227-264. Doi:10.1146/annurev-biochem-  
473 060815-014607.
- 474 Wang, Q., Yu, J., Kadungure, T., Beyene, J., Zhang, H., Lu, Q. 2018. ARMMs as a  
475 versatile platform for intracellular delivery of macromolecules. *Nature*  
476 *Communications* 9-960. Doi:10.1038/s41467-018-03390-x
- 477 Wilson, R.C., Doudna, J.A. 2013. Molecular mechanisms of RNA interference.  
478 *Annu. Rev. Biophys.* 42: 217–239. Doi:10.1146/annurev-biophys-083012-  
479 130404.
- 480 Yoshida, T., Nakamura, H., Masutani, H., Yodoi, J. 2005. The involvement of  
481 thioredoxin and thioredoxin binding protein-2 on cellular proliferation and  
482 aging process. *Annals New York Acad. Sciences.* 1055:1–12.  
483 Doi:10.1196/annals.1323.002.
- 484 Zhang, L., Reed, R.D. 2017. A practical guide to CRISPR/Cas9 genome editing in  
485 Lepidoptera. *bioRxiv preprint* Apr. 24. Doi.org/10.1101/130344.

486 Zotti, M., Santos, E.A., Cagliari, D., Christiaens, O., Taning, C.N.T., Smagghe, G.  
487 2018. RNA interference technology in crop protection against arthropod pests,  
488 pathogens and nematodes. *Pest Manag. Sci.* Doi:10.1002/ps.4813.
